# Supplementary material for: Platelet factor 4 limits Th17 differentiation and cardiac allograft rejection
Source: JCI journal article supplement (doi:10.1172/jci71858), 2014-01-26
Supplement: sd1 [file 1]

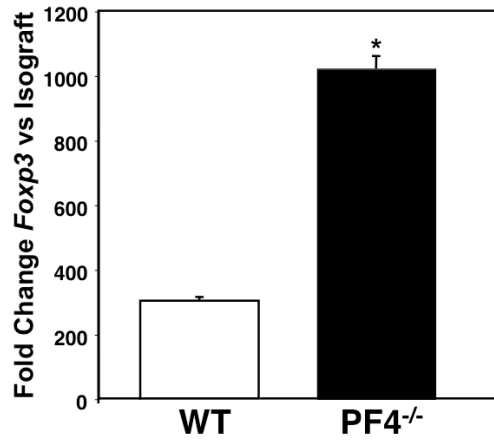

Supplemental S1. PF4<sup>-/-</sup> mice have increased intragraft *Foxp3* expression compared to WT mice (N=3, ± S.D. \*P<0.01 vs WT).

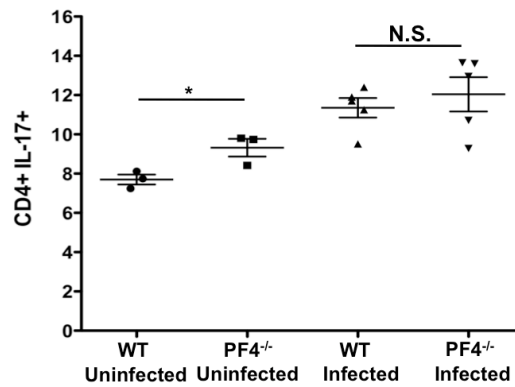

Supplemental S2. WT and PF4<sup>-/-</sup> mice were infected with non-lethal *Plasmodium yoelii* XNL and 7 days later CD4<sup>+</sup>IL-17<sup>+</sup> splenocytes were quantified in infected mice and control uninfected mice (\*P<0.03).

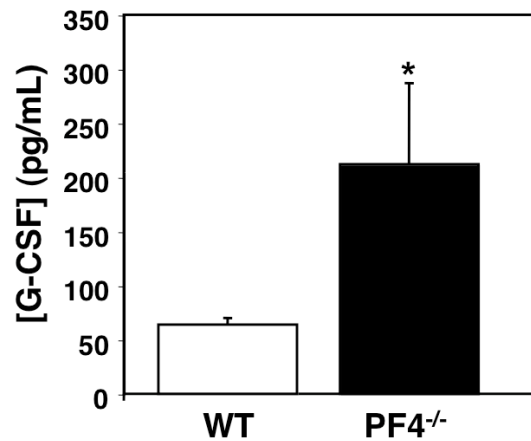

Supplemental S3. PF4<sup>-/-</sup> mice have increased plasma G-CSF (N=5, ± S.D. \*P<0.01 vs WT).

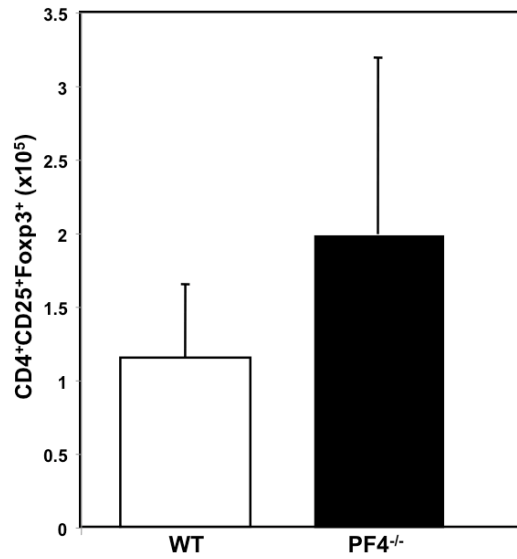

Supplemental S4. PF4<sup>-/-</sup> mice have increased, but not significantly, T reg T cells compared to WT mice (N=5, ± S.D.).

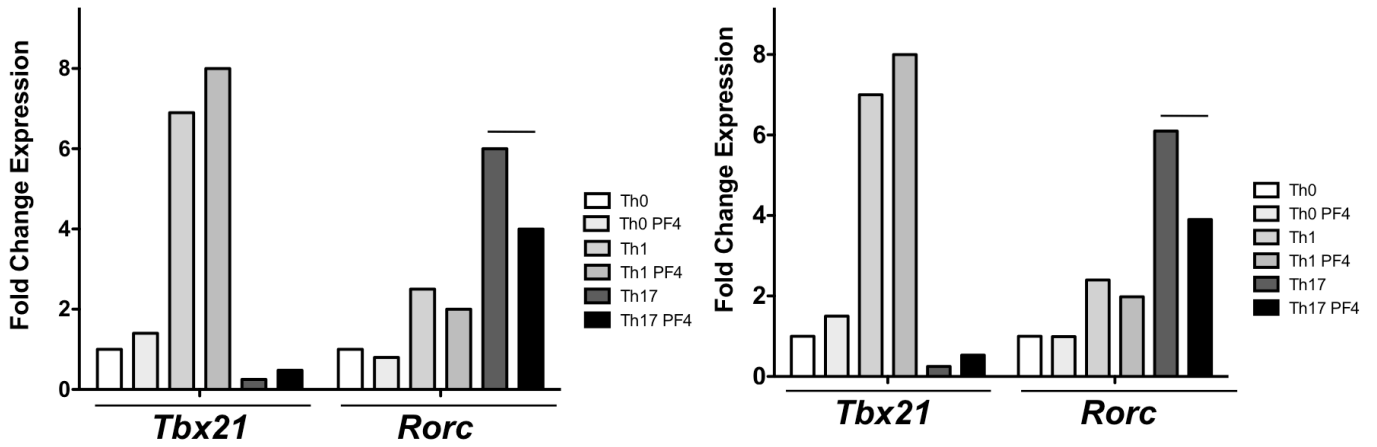

Supplemental S5. PF4 reduces *Rorc* expression *in vitro*.

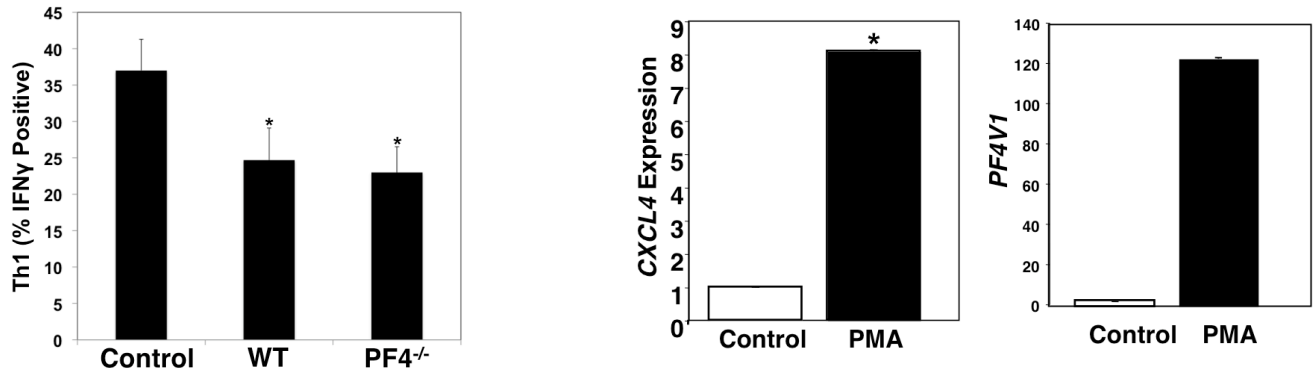

Supplemental S6. WT and PF4<sup>-/-</sup> platelets have the same effect on Th1 differentiation *in vitro* (N=3,  $\pm$  S.D. \*P<0.05 vs control).

Supplemental S7. Jurkat T cells stimulated with PMA express CXCL4 and the PF4 variant PF4V1 (n=3 $\pm$  S.D. \*P<0.01 vs Control).

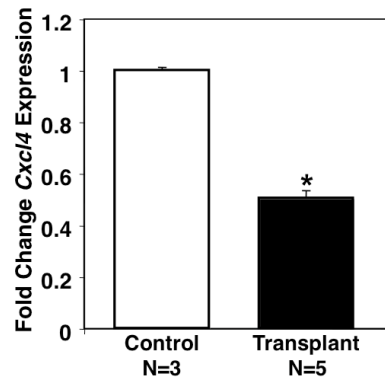

Supplemental S8. Mice were given BM12 heart transplant and 7 days later monocytes were isolated. *Cxcl4* expression was determined by qRT-PCR ( $\pm$  S.D. \*P<0.01 vs Control).

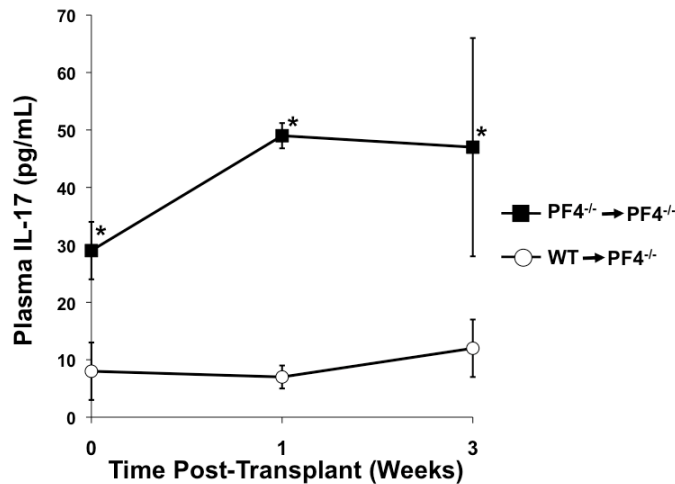

Supplemental S9. PF4<sup>-/-</sup> mice were reconstituted with either WT or PF4<sup>-/-</sup> bone marrow. Beginning 4 weeks later baseline and post-transplant plasma IL-17 was measured (N=4  $\pm$  S.D. \*P<0.01 vs WT $\rightarrow$ PF4<sup>-/-</sup>).
